# Supplementary material for: Large-ensemble assessment of the Arctic stratospheric polar vortex morphology and disruptions
Source: Copernicus journal article supplement (doi:10.5194/wcd-5-895-2024), 2024-07-10
Supplement: Supplementary file 1 [file wcd-5-895-2024-supplement.pdf]

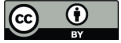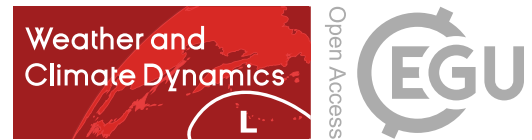

*Supplement of*

## **Large-ensemble assessment of the Arctic stratospheric polar vortex morphology and disruptions**

**Ales Kuchar et al.**

*Correspondence to:* Ales Kuchar (ales.kuchar@boku.ac.at)

The copyright of individual parts of the supplement might differ from the article licence.

## S1 Table of contents

- Tables S1 and S2
- ROC curves for displacement and split events (Figs. S1 and S2)
- Rank Histograms for 50 hPa and 100 hPa (Figs. S3-S12)

## 5 S2 Moment diagnostics of the polar vortex

The first step of the calculation is to define the limit of the vortex. The vortex is described by the area that has lower values of geopotential height than the limit, values higher than the limit are set equal to the limit so that these values do not contribute to the calculation of the diagnostics.

- 10 For the moment calculations (Eq. 3), the coordinates from the output of the climate models have to be converted from spherical to Cartesian ones. This is done by using Lambert's azimuthal equal-area projection, which converts a coordinate of latitude  $\phi$  and longitude  $\lambda$  to Cartesian Coordinates  $x$  and  $y$ , while preserving the area of the vortex:

$$\begin{aligned}x &= R\cos\lambda \\y &= R\sin\lambda\end{aligned}\tag{1}$$

with

$$R = a\sqrt{2(1 - \sin\phi)}\tag{2}$$

- 15 and the Earth's radius  $a = 6374$  km.

The absolute vortex moment is defined as:

$$M_{kl} = \int \int (q - q_b) x^k y^l dx dy\tag{3}$$

- where  $q$  is the actual geopotential height, after values higher than the limit have been truncated, and  $q_b$  is the value of the limit.  
20 The integration is carried out by summing over each grid point available in the model output. The moment is two-dimensional so two separate exponents are necessary:  $k$  for the x-direction and  $l$  for the y-direction.

Using the absolute vortex moment, we can determine the center of the vortex (centroid) in Cartesian coordinates:

$$(\bar{x}, \bar{y}) = \frac{(M_{10}, M_{01})}{M_{00}}\tag{4}$$

With the help of the centroid coordinates, we can calculate the relative vortex moment:

25 
$$J_{kl} = \int \int (q - q_b) (x - \bar{x})^k (y - \bar{y})^l dx dy\tag{5}$$

which is needed to retrieve the moment diagnostics describing different characteristics of the polar vortex, which will be explained in the following

## S2.1 Angle

30 The angle  $\psi$  describes the orientation of the polar vortex. To this end, the vortex is represented by an ellipse and  $\psi$  is the angle between its major axis and the x-axis, which lies on the meridian of 90°W and 90°E because of the conversion from spherical to Cartesian coordinates.

$$\psi = \frac{1}{2} \tan^{-1} \left( \frac{J_{11}}{J_{20} - J_{02}} \right) \quad (6)$$

## S2.2 Aspect ratio

35 The aspect ratio of the ellipse is the ratio of its major axis to its minor axis. This diagnostic describes how stretched the vortex is: A higher value indicates a strongly stretched vortex, whereas a lower aspect ratio implies a more circular polar vortex. An exceptionally high value is often associated with a disturbance of the polar vortex.

$$r = \left| \frac{(J_{20} + J_{02}) + \sqrt{4J_{11}^2 + (J_{20} - J_{02})}}{(J_{20} + J_{02}) + \sqrt{4J_{11}^2 + (J_{20} - J_{02})}} \right|^{\frac{1}{2}} \quad (7)$$

## S2.3 Objective area

The area of the ellipse is an indicator of the strength of the polar vortex.

$$40 \quad A = \frac{M_{00}}{q_b} \quad (8)$$

## S2.4 Kurtosis

45 The excess kurtosis reveals how the values of geopotential height are distributed within the ellipse describing the polar vortex. An excess kurtosis of 0 is reached, if the value of geopotential height is constant. Negative values are achieved when two separate areas of low geopotential height exist, e.g. when the vortex splits. High values are produced when the geopotential height in the center is low and has higher values surrounding it.

## S2.5 Centroid Latitude and Centroid Longitude

The location of the centroid of the polar vortex in Cartesian Coordinates (Eq. 4) can be transferred back to spherical coordinates, which gives us the centroid latitude and centroid longitude. This simplifies the interpretation of the centroid coordinates, e.g. a lower centroid latitude is often associated with a disrupted vortex and can be indicative of a displacement.

## 50 S3 ROC curves

55 The receiver operating characteristic (ROC) curves are plotted in a diagram with the false positive rate on the x-axis and the true positive rate on the y-axis (see Figs. S1 and S2). In this specific case, the false positive rate indicates the probability that the ensemble is simulating an event, even though there was no event observed in the reanalysis. The true positive rate is the probability that the ensemble detects an event when it actually occurs. For an ideal forecast, the curve goes along the y-axis at a false positive rate of 0 and when it reaches the top of the diagram, it moves in the x-direction to the right side of the diagram. An ensemble that produces a curve that describes the diagonal line in the plot is not better than randomly guessing the occurrence of the events. To make the interpretation easier the area under the ROC curve (AOC) can be calculated. In an ideal case, the area is equal to 1. For the case where the curve coincides with the diagonal, the area is equal to 0.5. For further details about the application and interpretation of the ROC diagram we refer to Wilks (2011) or Jolliffe and Stephenson (2012).

Table S1: Summary table including metrics: bias, spread and AOC. AOC related to displacement and split events is in the table associated with centroid latitude and aspect ratio, respectively.

|              |                    | 100 hPa     |        |     | 50 hPa         |               |     | 10 hPa         |                |             |
|--------------|--------------------|-------------|--------|-----|----------------|---------------|-----|----------------|----------------|-------------|
|              |                    | bias        | spread | AUC | bias           | spread        | AUC | bias           | spread         | AUC         |
| CanESM2      | aspect ratio       | 590.99      | 213.27 |     | 210.74         | 54.06         |     | 148.61         | 7.10           | 0.55        |
|              | objective area     | 343.13      | 122.48 |     | 15.73          | 77.34         |     | 197.27         | 128.91         |             |
|              | kurtosis           | 11.78       | 226.71 |     | 591.70         | 240.18        |     | <b>5525.35</b> | 3790.66        |             |
|              | centroid latitude  | 418.52      | 79.54  |     | 336.71         | 53.66         |     | 781.14         | 47.83          | 0.66        |
|              | centroid longitude | 118.84      | 66.86  |     | 3.13           | 141.43        |     | 224.01         | 13.95          |             |
| CanESM5      | aspect ratio       | 184.78      | 48.57  |     | 266.95         | 59.42         |     | 772.06         | 140.74         | <b>0.45</b> |
|              | objective area     | 894.65      | 1.51   |     | <b>1520.33</b> | 23.75         |     | 425.06         | 11.87          |             |
|              | kurtosis           | 118.64      | 411.00 |     | 16.80          | 353.75        |     | 4577.71        | <b>4368.73</b> |             |
|              | centroid latitude  | 290.00      | 53.74  |     | 276.07         | 65.13         |     | 19.30          | 6.20           | 0.59        |
|              | centroid longitude | 44.20       | 47.26  |     | 1.48           | 15.65         |     | 120.33         | 224.55         |             |
| CESM2        | aspect ratio       | 104.88      | 10.34  |     | 271.81         | 32.92         |     | 576.90         | 127.07         | 0.59        |
|              | objective area     | 334.06      | 91.54  |     | 476.74         | 166.81        |     | 1587.79        | 344.51         |             |
|              | kurtosis           | 6.82        | 217.62 |     | 61.09          | 378.66        |     | 2239.48        | 2203.39        |             |
|              | centroid latitude  | 252.67      | 88.90  |     | 366.22         | 115.06        |     | 233.96         | 21.51          | 0.61        |
|              | centroid longitude | 26.31       | 50.33  |     | <b>0.01</b>    | 33.15         |     | 67.85          | 56.46          |             |
| CNRM-CM6-1   | aspect ratio       | 6.74        | 0.72   |     | 14.67          | <b>0.03</b>   |     | 108.77         | 0.28           | 0.64        |
|              | objective area     | 3.00        | 5.46   |     | 51.57          | 14.76         |     | 847.55         | 78.80          |             |
|              | kurtosis           | 227.27      | 10.95  |     | 866.92         | 176.20        |     | 4018.98        | 2329.24        |             |
|              | centroid latitude  | <b>0.06</b> | 2.24   |     | 22.69          | 0.35          |     | 15.46          | 8.79           | <b>0.71</b> |
|              | centroid longitude | 0.39        | 4.15   |     | 15.80          | 2.72          |     | 0.90           | 2.94           |             |
| INM-CM5-0    | aspect ratio       | 257.00      | 69.24  |     | 119.68         | 51.19         |     | 0.65           | 1.80           | 0.53        |
|              | objective area     | 26.65       | 71.31  |     | 71.70          | 80.82         |     | 165.95         | 436.67         |             |
|              | kurtosis           | 52.26       | 221.07 |     | 114.18         | 133.80        |     | 3.01           | 25.45          |             |
|              | centroid latitude  | 304.27      | 182.85 |     | 391.94         | 148.44        |     | 90.28          | 7.54           | 0.67        |
|              | centroid longitude | 55.00       | 53.04  |     | 0.03           | 75.01         |     | 0.52           | 7.36           |             |
| IPSL-CM6A-LR | aspect ratio       | 41.73       | 4.27   |     | 115.30         | 15.54         |     | 450.04         | 2.55           | 0.63        |
|              | objective area     | 507.80      | 75.51  |     | 137.37         | 71.86         |     | 570.49         | 730.88         |             |
|              | kurtosis           | 1.26        | 94.65  |     | 10.65          | 132.02        |     | 45.86          | 69.42          |             |
|              | centroid latitude  | 44.41       | 18.49  |     | 64.22          | 46.14         |     | 156.46         | 7.66           | 0.63        |
|              | centroid longitude | 77.08       | 41.45  |     | 3.29           | 403.83        |     | 289.33         | 6.17           |             |
| MIROC6       | aspect ratio       | 8.38        | 7.86   |     | 6.06           | 13.84         |     | 19.07          | 6.55           | 0.59        |
|              | objective area     | 841.65      | 420.28 |     | 900.00         | <b>790.83</b> |     | 624.89         | 1015.18        |             |
|              | kurtosis           | 62.65       | 0.38   |     | 19.48          | 15.54         |     | 40.58          | 19.20          |             |
|              | centroid latitude  | 0.16        | 19.33  |     | 97.24          | 43.67         |     | 332.99         | 19.25          | 0.62        |
|              | centroid longitude | 101.61      | 9.90   |     | 26.33          | 199.91        |     | 209.12         | 4.14           |             |
| UKESM1-0-LL  | aspect ratio       | 99.95       | 19.77  |     | 91.16          | 17.09         |     | <b>0.33</b>    | 0.27           | 0.58        |
|              | objective area     | 0.15        | 127.42 |     | 161.29         | 91.84         |     | 67.10          | 14.83          |             |

Continued on next page

Table S1: Summary table including metrics: bias, spread and AOC. AOC related to displacement and split events is in the table associated with centroid latitude and aspect ratio, respectively. We mark the model with the best and worst performance by red and blue color, respectively.

|               |                    | 100 hPa        |                |     | 50 hPa |        |     | 10 hPa  |             |      |
|---------------|--------------------|----------------|----------------|-----|--------|--------|-----|---------|-------------|------|
|               |                    | bias           | spread         | AUC | bias   | spread | AUC | bias    | spread      | AUC  |
|               | kurtosis           | 54.18          | 107.00         |     | 17.97  | 51.80  |     | 421.63  | 99.53       |      |
|               | centroid latitude  | 1.94           | <b>0.19</b>    |     | 18.81  | 1.03   |     | 16.88   | 27.50       | 0.66 |
|               | centroid longitude | 0.33           | 5.42           |     | 1.19   | 3.25   |     | 156.71  | 29.47       |      |
| MPI-ESM1-2-HR | aspect ratio       | 1.81           | 2.84           |     | 11.33  | 1.06   |     | 116.15  | <b>0.01</b> | 0.56 |
|               | objective area     | 535.27         | 72.35          |     | 484.98 | 196.42 |     | 1046.07 | 824.85      |      |
|               | kurtosis           | 3.57           | 8.82           |     | 27.34  | 78.91  |     | 453.43  | 40.79       |      |
|               | centroid latitude  | 151.91         | 10.35          |     | 89.40  | 7.42   |     | 123.33  | 0.91        | 0.59 |
|               | centroid longitude | 16.50          | 9.09           |     | 1.26   | 13.32  |     | 4.53    | 80.94       |      |
| MPI-ESM1-2-LR | aspect ratio       | 3.77           | 0.56           |     | 11.93  | 0.55   |     | 242.95  | 7.78        | 0.65 |
|               | objective area     | 1030.16        | 372.84         |     | 776.32 | 568.10 |     | 1118.40 | 1266.02     |      |
|               | kurtosis           | 1.91           | 13.73          |     | 0.04   | 71.31  |     | 324.23  | 102.14      |      |
|               | centroid latitude  | 298.72         | 32.05          |     | 154.32 | 12.51  |     | 199.48  | 21.33       | 0.66 |
|               | centroid longitude | 0.65           | 57.89          |     | 26.56  | 2.04   |     | 39.20   | 214.11      |      |
| GFDL-CM3      | aspect ratio       | 271.25         | 116.71         |     |        |        |     |         |             |      |
|               | objective area     | <b>6615.54</b> | <b>2364.37</b> |     |        |        |     |         |             |      |
|               | kurtosis           | 42.21          | 423.25         |     |        |        |     |         |             |      |
|               | centroid latitude  | 471.85         | 282.04         |     |        |        |     |         |             |      |
|               | centroid longitude | 69.90          | 52.72          |     |        |        |     |         |             |      |

**Table S2.** List of SSWs in ERA5

|    | onset dates | vortex type  |
|----|-------------|--------------|
| 0  | 1979-02-22  | split        |
| 1  | 1980-02-29  | displaced    |
| 2  | 1981-03-04  | displaced    |
| 3  | 1981-12-04  | unclassified |
| 4  | 1984-02-23  | displaced    |
| 5  | 1985-01-01  | split        |
| 6  | 1987-01-23  | displaced    |
| 7  | 1987-12-08  | split        |
| 8  | 1988-03-14  | split        |
| 9  | 1989-02-21  | split        |
| 10 | 1998-12-15  | displaced    |
| 11 | 1999-02-25  | split        |
| 12 | 2000-03-20  | displaced    |
| 13 | 2001-02-11  | split        |
| 14 | 2001-12-30  | displaced    |
| 15 | 2002-02-17  | displaced    |
| 16 | 2003-01-18  | split        |
| 17 | 2004-01-05  | displaced    |
| 18 | 2006-01-21  | displaced    |
| 19 | 2007-02-24  | displaced    |
| 20 | 2008-02-22  | displaced    |
| 21 | 2009-01-24  | split        |
| 22 | 2010-02-09  | displaced    |
| 23 | 2010-03-24  | displaced    |
| 24 | 2013-01-06  | split        |

## **S5 Figures**

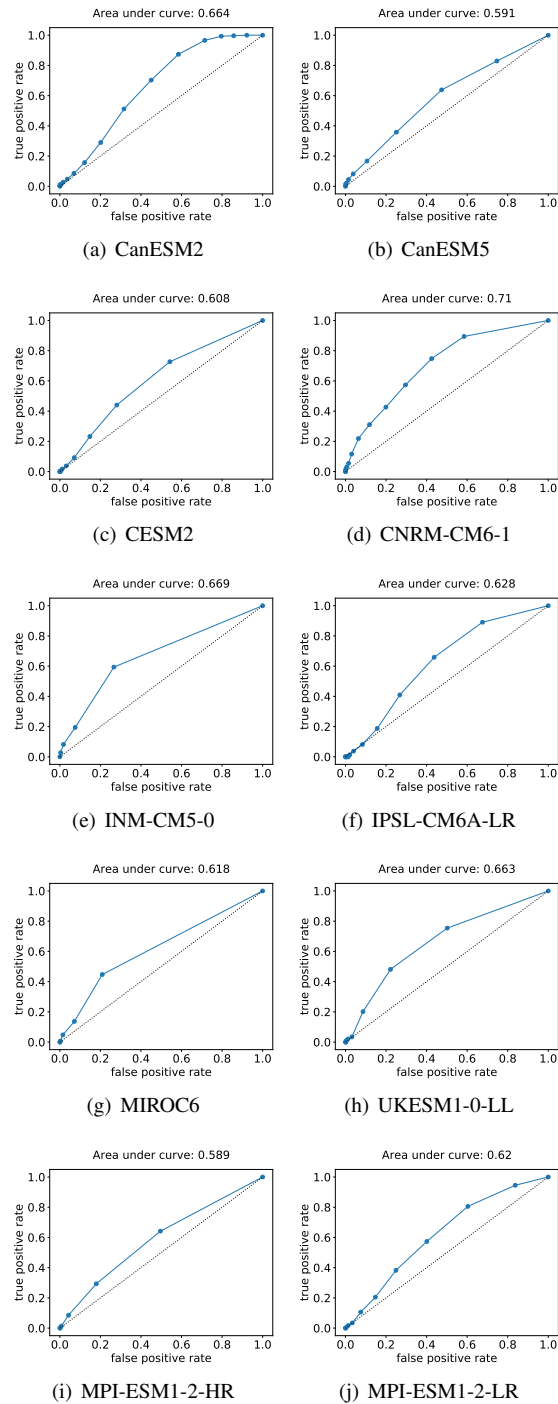

**Figure S1.** ROC curves for displacement events

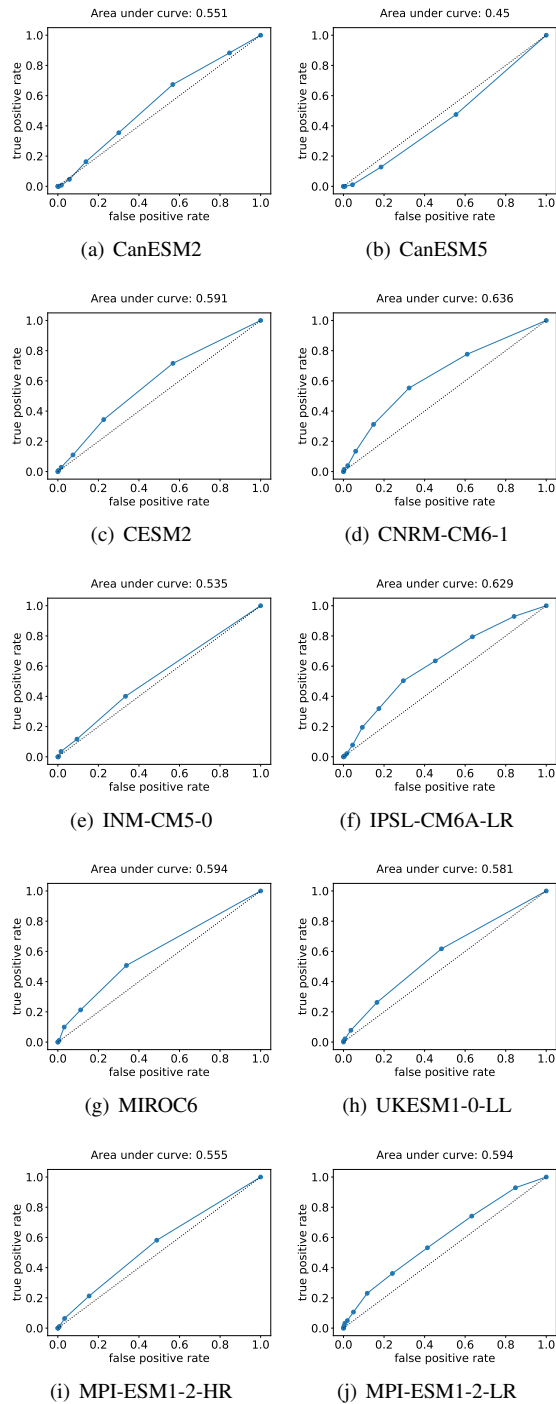

**Figure S2.** ROC curves for split events



aspect ratio 50hPa

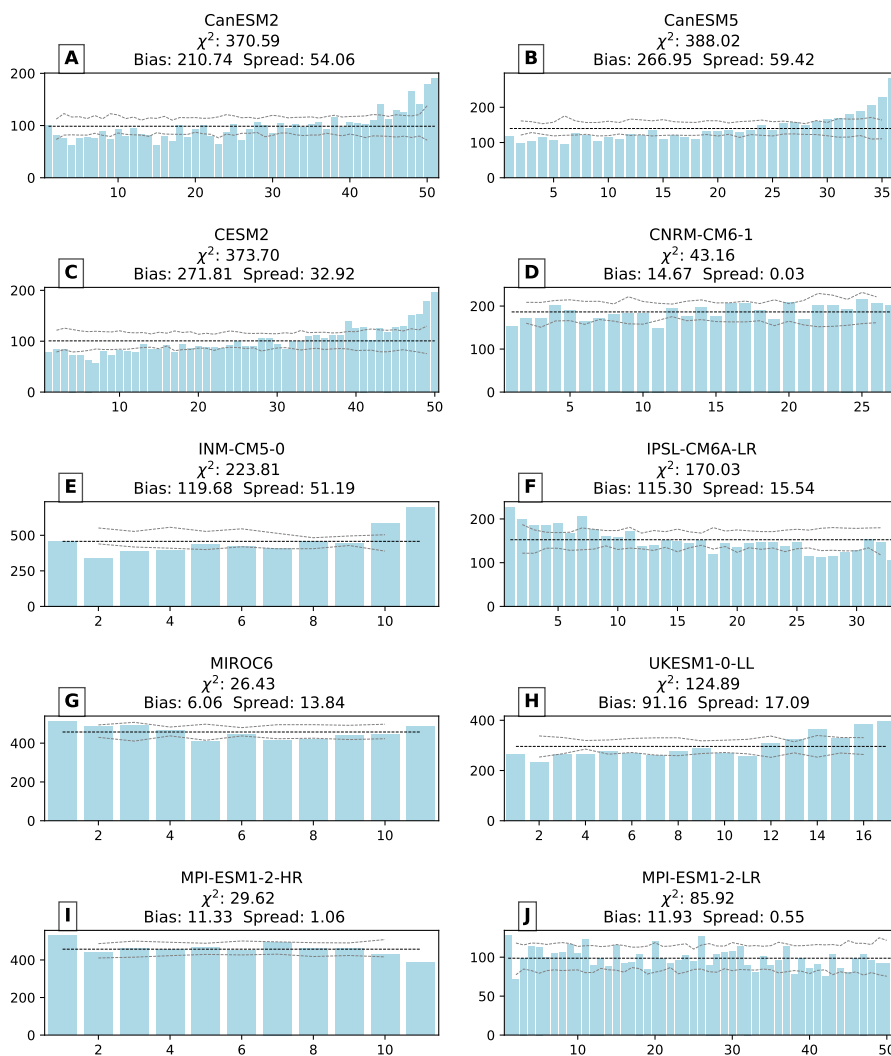

**Figure S3.** Rank histograms of aspect ratio at 50 hPa of all analyzed model ensembles: CanESM2 (A), CanESM5 (B), CESM2 (C), CNRM-CM6-1 (D), INM-CM5-0 (E), IPSL-CM6A-LR (F), MIROC6 (G), UKESM1-0-LL (H), MPI-ESM1-2-HR (I) and MPI-ESM1-2-LR (J) with their respective statistics. Blue bars show counts for the individual bins, the black dashed line corresponds to the expected value for a flat histogram, the grey dashed lines indicate the perfect model range.

centroid latitude 50hPa

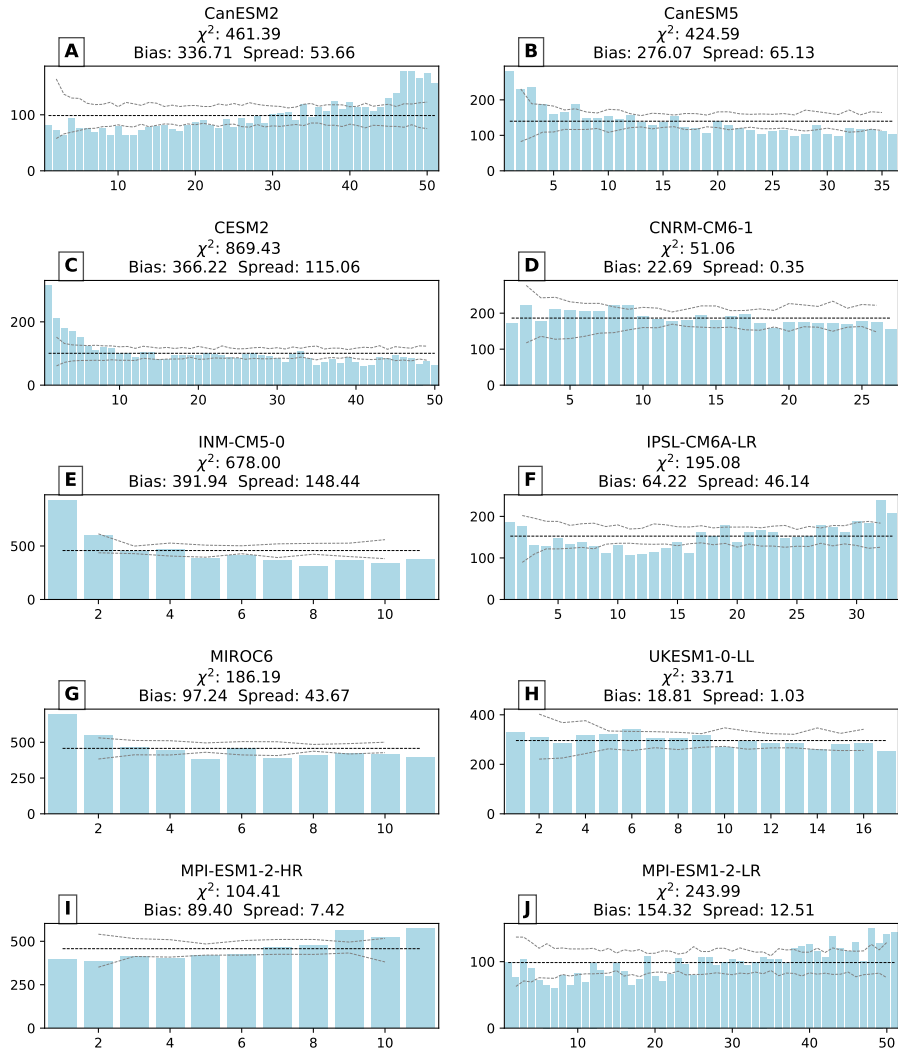

**Figure S4.** As figure S3 but for centroid latitude at 50 hPa of all analyzed model ensembles: CanESM2 (A), CanESM5 (B), CESM2 (C), CNRM-CM6-1 (D), INM-CM5-0 (E), IPSL-CM6A-LR (F), MIROC6 (G), UKESM1-0-LL (H), MPI-ESM1-2-HR (I) and MPI-ESM1-2-LR (J).

centroid longitude 50hPa

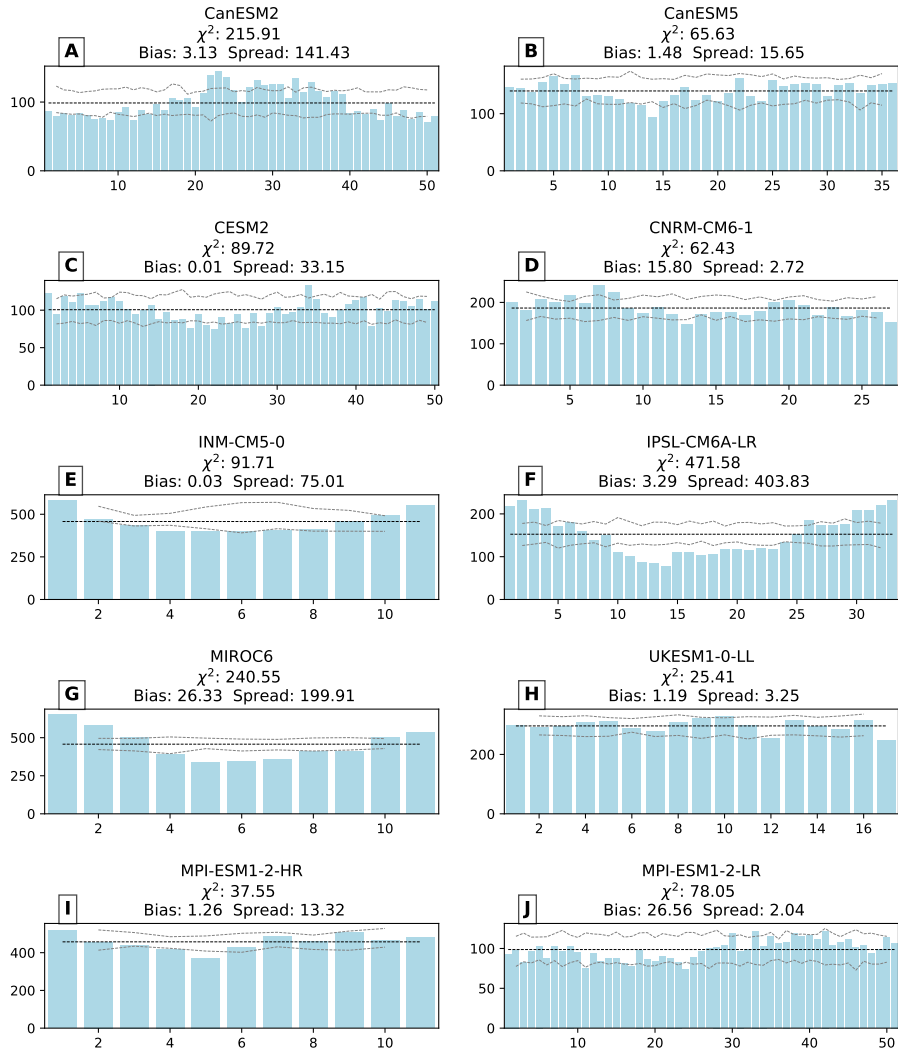

**Figure S5.** As figure S3 but for centroid longitude at 50 hPa of all analyzed model ensembles: CanESM2 (A), CanESM5 (B), CESM2 (C), CNRM-CM6-1 (D), INM-CM5-0 (E), IPSL-CM6A-LR (F), MIROC6 (G), UKESM1-0-LL (H), MPI-ESM1-2-HR (I) and MPI-ESM1-2-LR (J).

kurtosis 50hPa

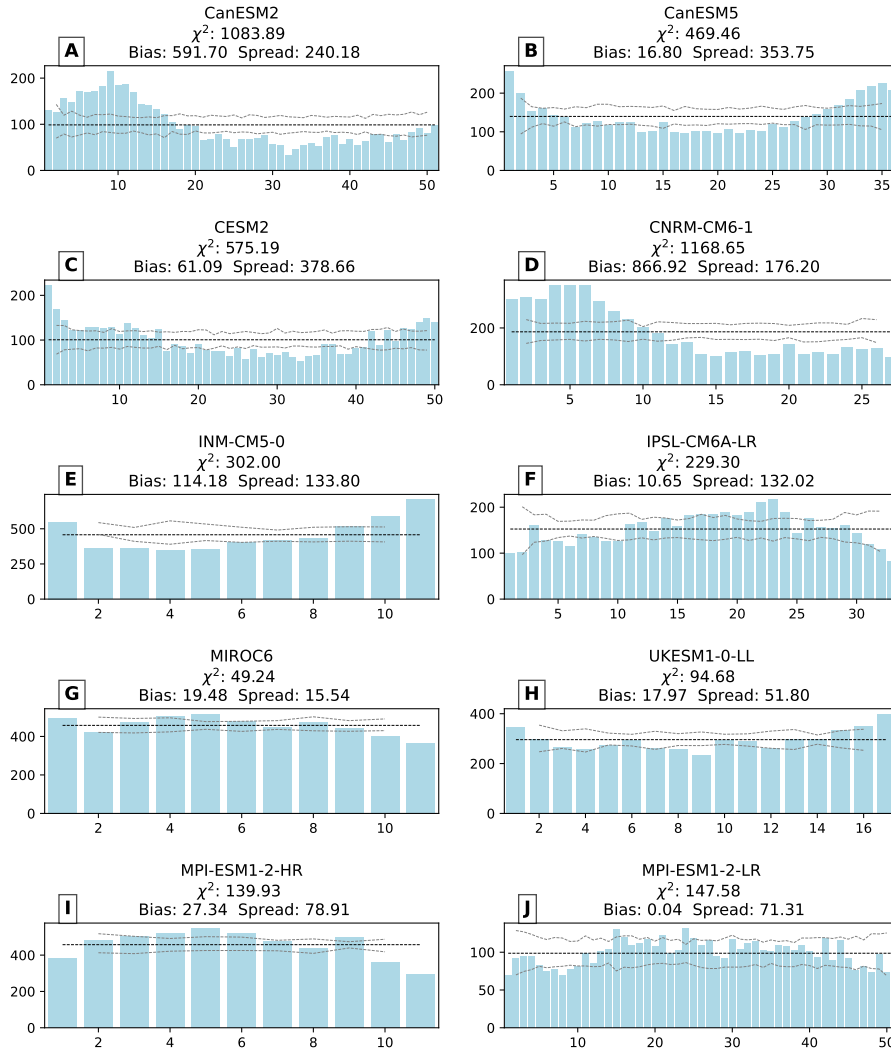

**Figure S6.** As figure S3 but for kurtosis at 50 hPa of all analyzed model ensembles: CanESM2 (A), CanESM5 (B), CESM2 (C), CNRM-CM6-1 (D), INM-CM5-0 (E), IPSL-CM6A-LR (F), MIROC6 (G), UKESM1-0-LL (H), MPI-ESM1-2-HR (I) and MPI-ESM1-2-LR (J).

objective area 50hPa

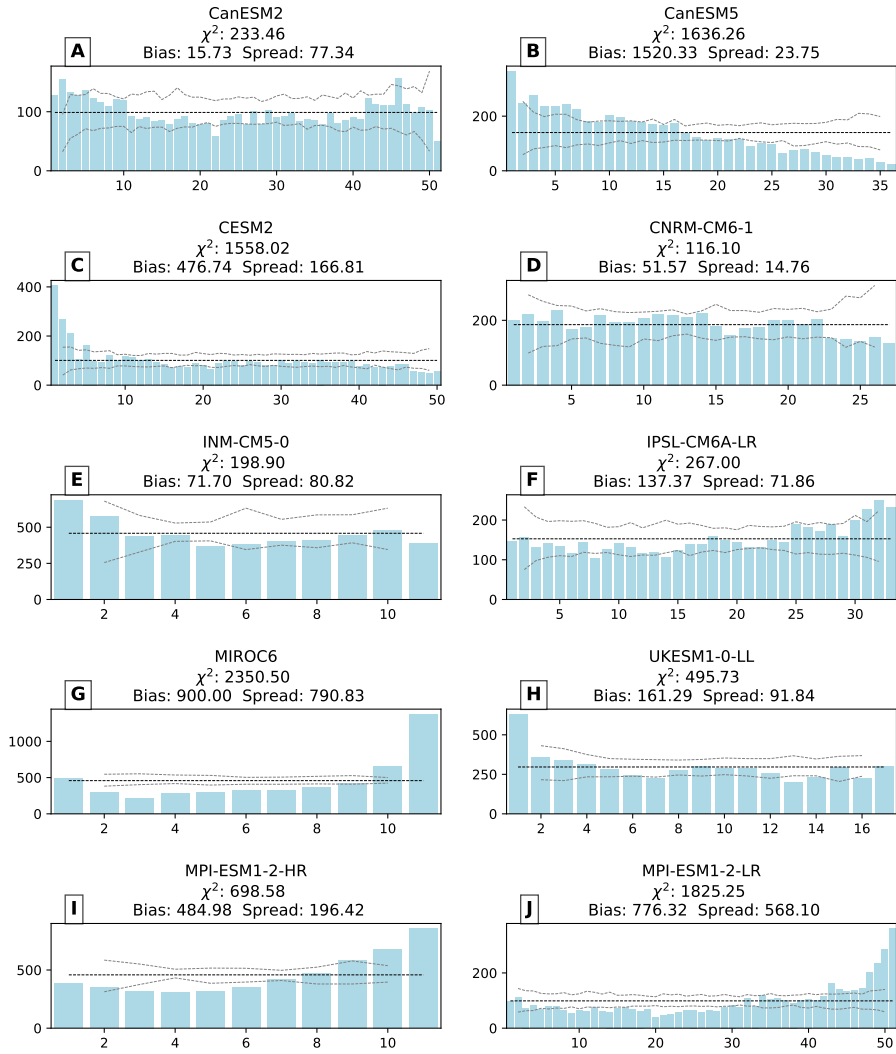

**Figure S7.** As figure S3 but for objective area at 50hPa of all analyzed model ensembles: CanESM2 (A), CanESM5 (B), CESM2 (C), CNRM-CM6-1 (D), INM-CM5-0 (E), IPSL-CM6A-LR (F), MIROC6 (G), UKESM1-0-LL (H), MPI-ESM1-2-HR (I) and MPI-ESM1-2-LR (J).

aspect ratio 100hPa

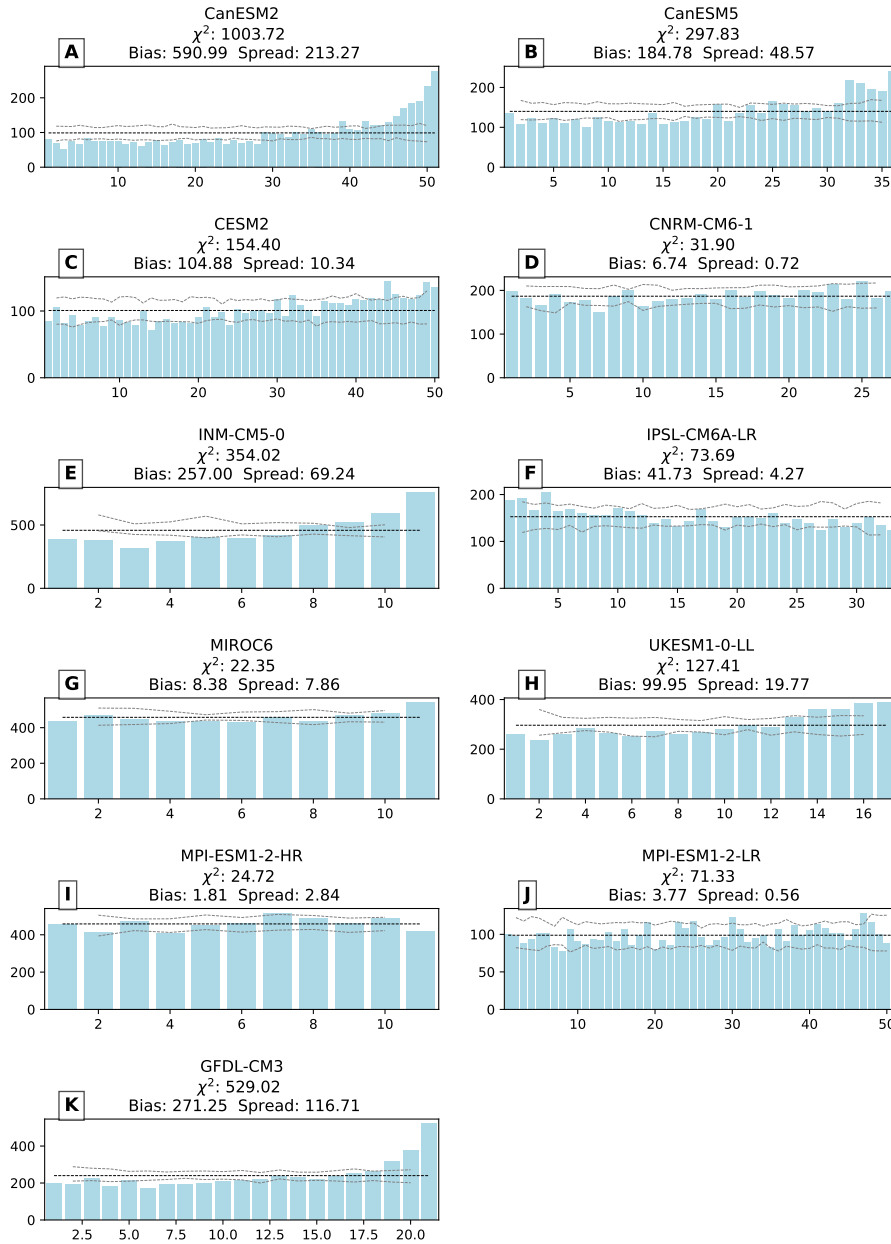

**Figure S8.** As figure S3 but for aspect ratio at 100hPa of all analyzed model ensembles: CanESM2 (A), CanESM5 (B), CESM2 (C), CNRM-CM6-1 (D), INM-CM5-0 (E), IPSL-CM6A-LR (F), MIROC6 (G), UKESM1-0-LL (H), MPI-ESM1-2-HR (I), MPI-ESM1-2-LR (J) and GFDL-CM3 (K).

centroid latitude 100hPa

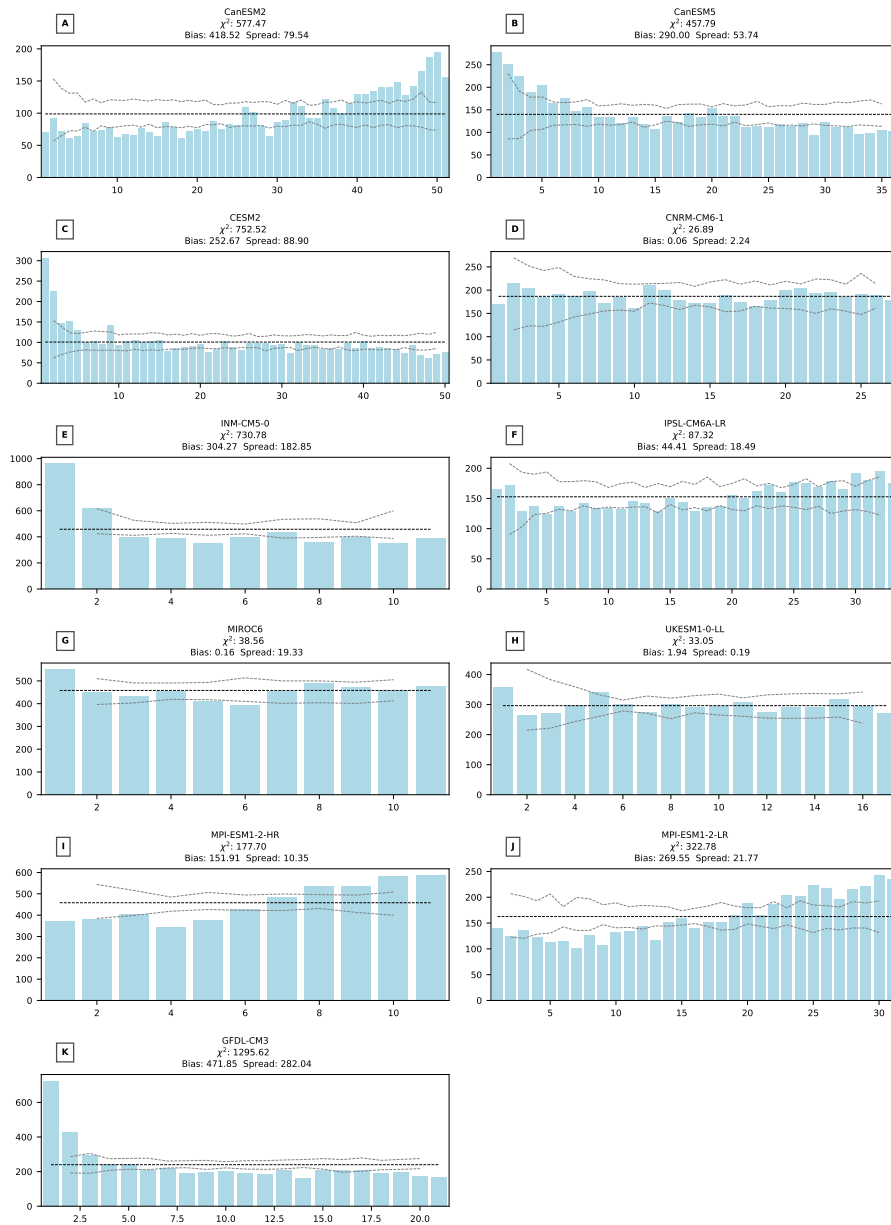

**Figure S9.** As figure S3 but for centroid latitude at 100 hPa of all analyzed model ensembles: CanESM2 (A), CanESM5 (B), CESM2 (C), CNRM-CM6-1 (D), INM-CM5-0 (E), IPSL-CM6A-LR (F), MIROC6 (G), UKESM1-0-LL (H), MPI-ESM1-2-HR (I), MPI-ESM1-2-LR (J) and GFDL-CM3 (K).

centroid longitude 100hPa

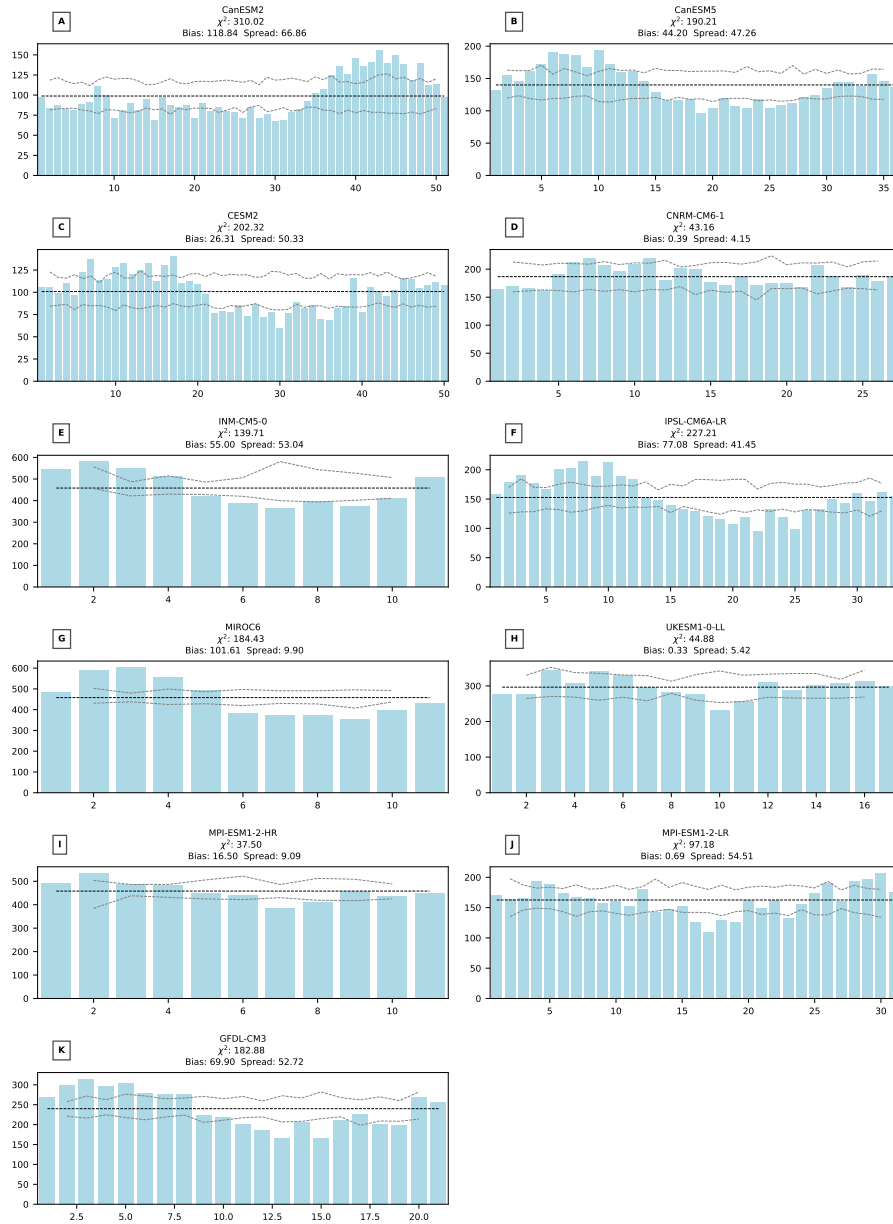

**Figure S10.** As figure S3 but for centroid longitude at 100 hPa of all analyzed model ensembles: CanESM2 (A), CanESM5 (B), CESM2 (C), CNRM-CM6-1 (D), INM-CM5-0 (E), IPSL-CM6A-LR (F), MIROC6 (G), UKESM1-0-LL (H), MPI-ESM1-2-HR (I), MPI-ESM1-2-LR (J) and GFDL-CM3 (K).



kurtosis 100hPa

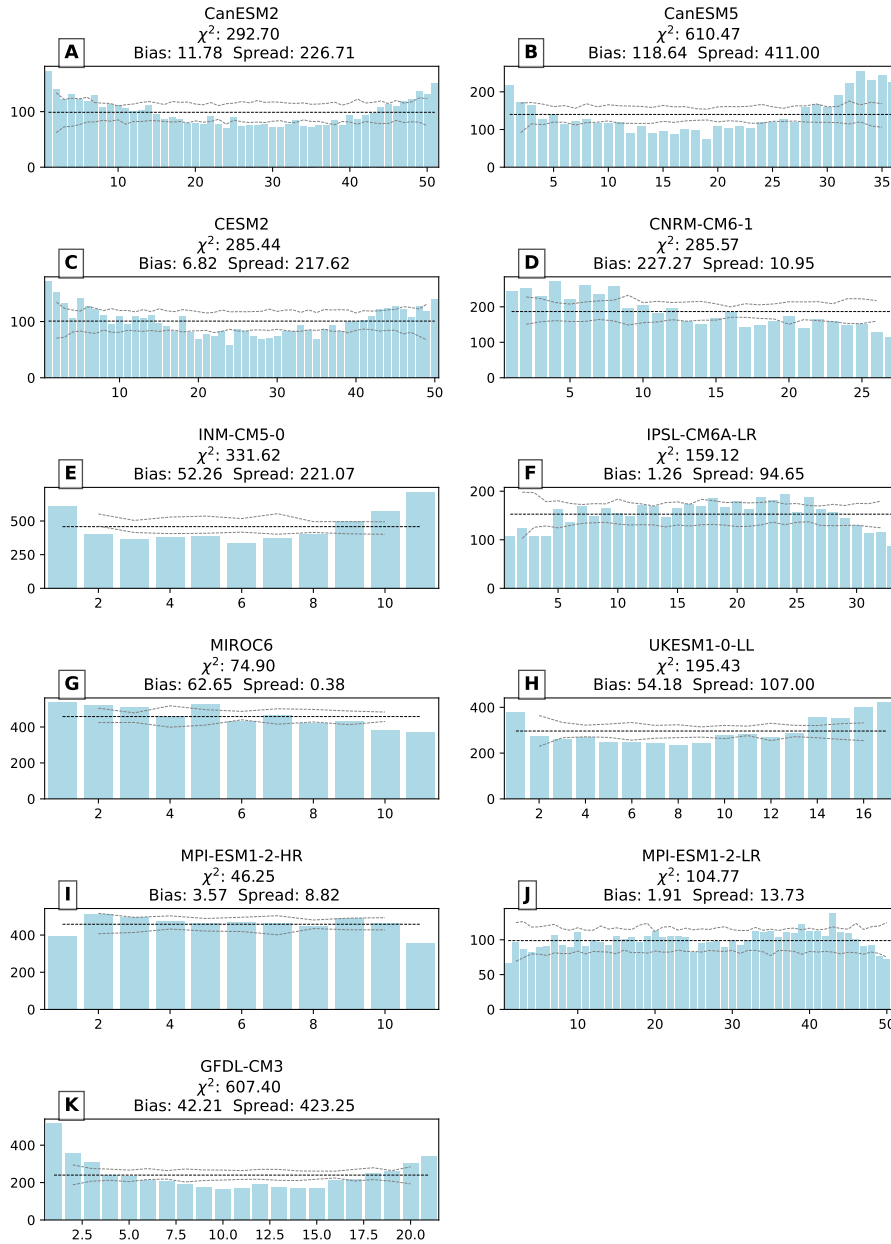

**Figure S11.** As figure S3 but for kurtosis at 100 hPa of all analyzed model ensembles: CanESM2 (A), CanESM5 (B), CESM2 (C), CNRM-CM6-1 (D), INM-CM5-0 (E), IPSL-CM6A-LR (F), MIROC6 (G), UKESM1-0-LL (H), MPI-ESM1-2-HR (I), MPI-ESM1-2-LR (J) and GFDL-CM3 (K).

objective area 100hPa

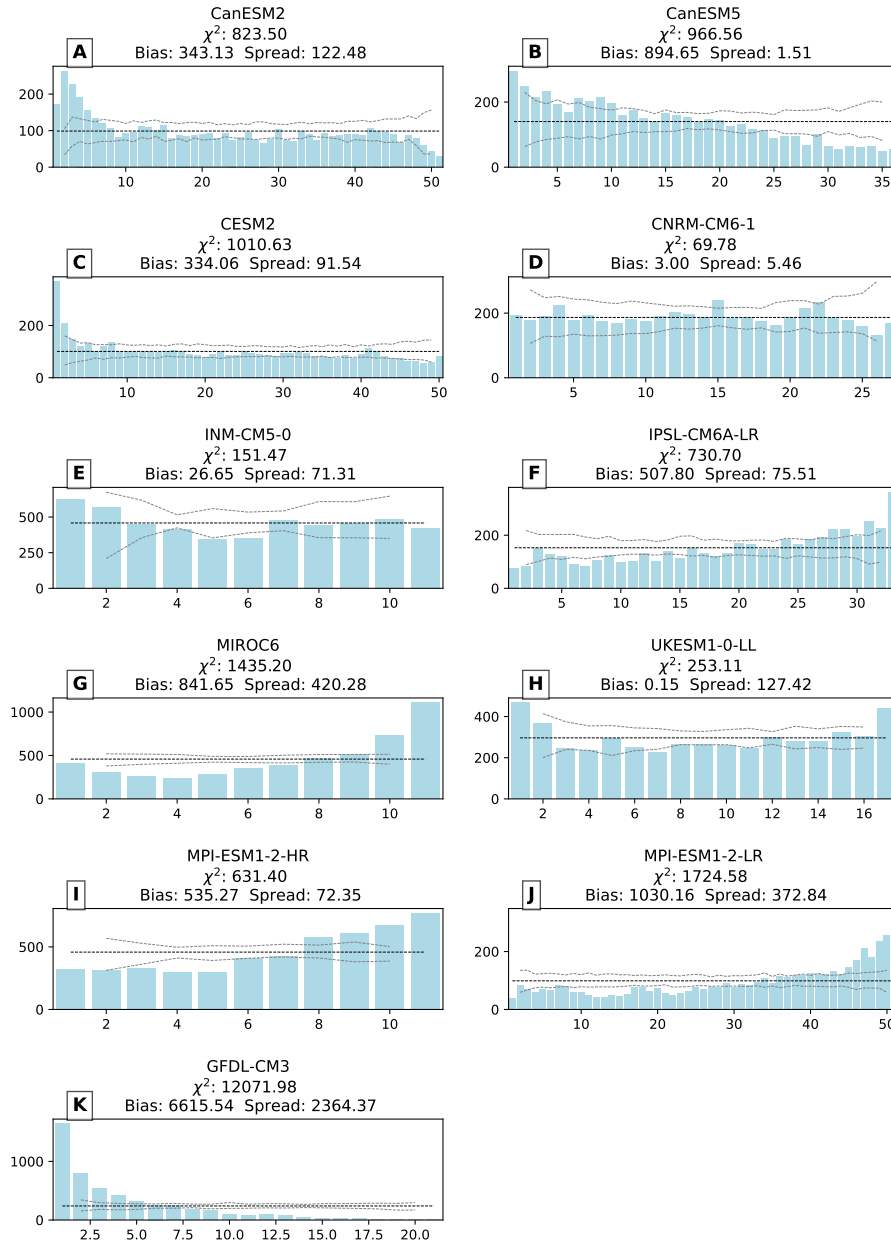

**Figure S12.** As figure S3 but for objective area at 100hPa of all analyzed model ensembles: CanESM2 (A), CanESM5 (B), CESM2 (C), CNRM-CM6-1 (D), INM-CM5-0 (E), IPSL-CM6A-LR (F), MIROC6 (G), UKESM1-0-LL (H), MPI-ESM1-2-HR (I), MPI-ESM1-2-LR (J) and GFDL-CM3 (K).

## References

Jolliffe, I. T. and Stephenson, D. B.: Forecast verification: a practitioner's guide in atmospheric science, John Wiley & Sons, 2012.  
Wilks, D. S.: Statistical methods in the atmospheric sciences, vol. 100, Academic press, 2011.
